# Supplementary material for: Passive droplet generation in aqueous two-phase systems with a variable-width microchannel
Source: Royal Society of Chemistry journal article supplement (doi:10.1039/c9sm00469f), 2019-01-01
Supplement: c9sm00469f1.pdf [file c9sm00469f1.pdf]

# Passive droplet generation in aqueous two-phase systems with a variable-width microchannel

*Daeho Choi<sup>‡†\*</sup>, Eunjeong Lee<sup>†\*</sup>, Sung-Jin Kim<sup>¶</sup>, and Minsub Han<sup>†\*</sup>*

<sup>†</sup> Mechanical Engineering, Incheon National University, Incheon, 22012, Korea

<sup>¶</sup> Mechanical Engineering, Konkuk University, 05029, Seoul, Korea

<sup>‡</sup> Department of Research and Development, Hanil Knuckle Press Co. Ltd., Incheon, Korea

<sup>\*</sup> equal contributions

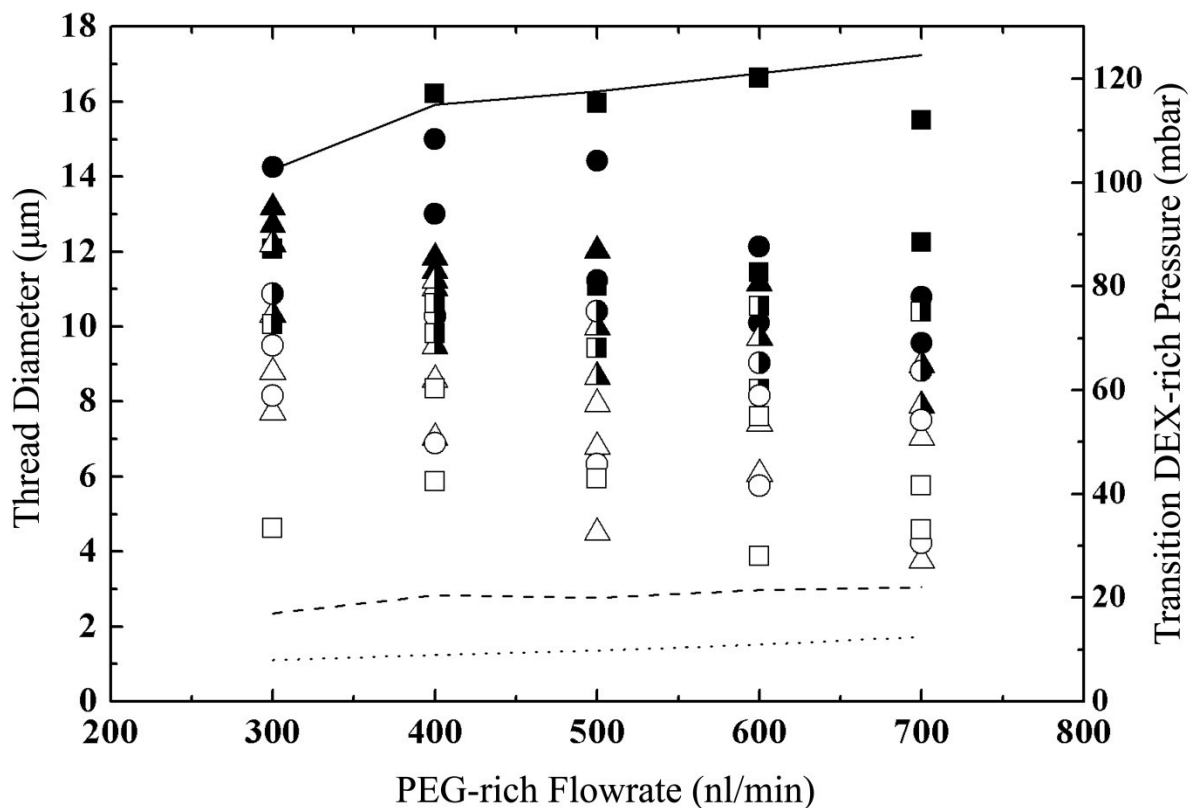

[Fig.SI-1] The concentration case of DEX/PEG= 6.4/5 (% w/v). The triangle symbol stands for DEX-inlet width of  $2.89 \pm 0.08$ , the circular symbol for  $4.74 \pm 0.03$ , and the rectangular symbol for  $10.36 \pm 0.09$   $\mu\text{m}$ . The open symbol stands for the droplet-generation regime, the half-filled symbol for the transition regime, the filled symbol for the stable jet regime. The solid line stands for the width of  $2.89 \pm 0.08$ , the dashed line for  $4.74 \pm 0.03$ , and the dotted line for  $10.36 \pm 0.09$   $\mu\text{m}$ .

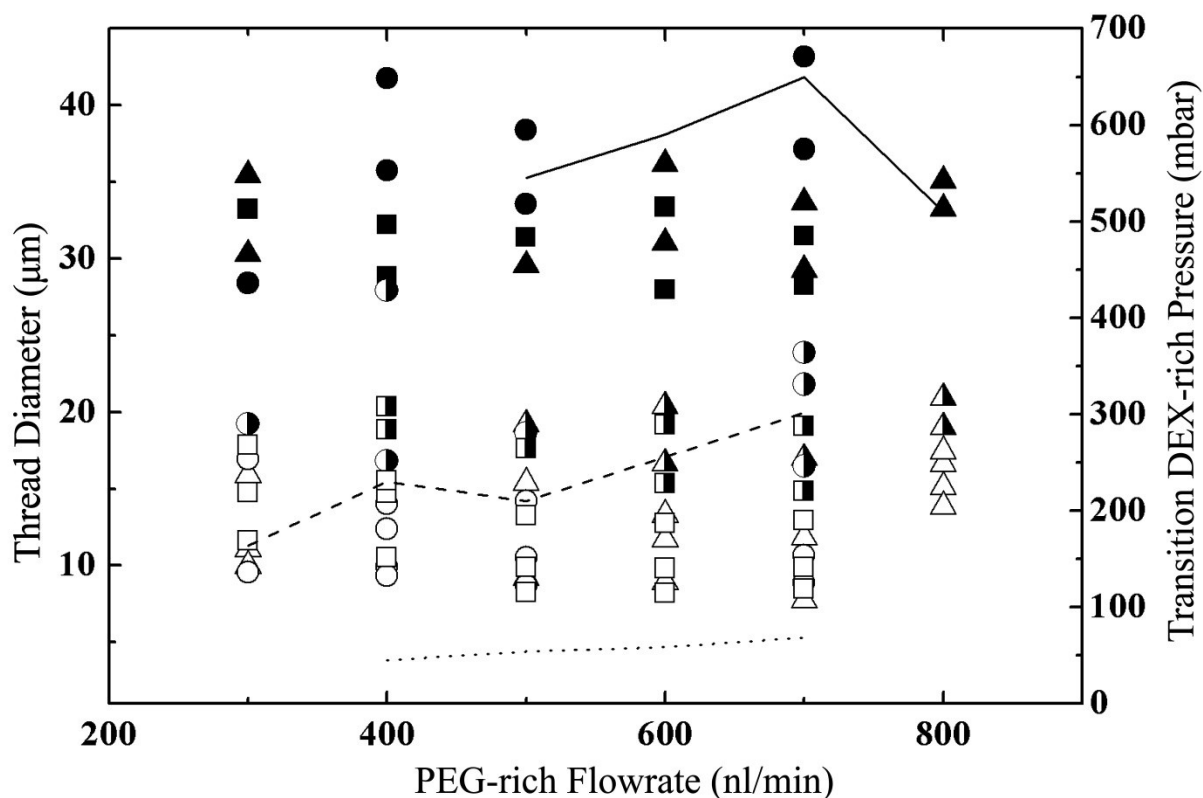

[Fig.SI-2] The concentration case of DEX/PEG= 16/10 (% w/v). The triangle symbol stands for DEX-inlet width of  $2.89 \pm 0.08$ , the circular symbol for  $4.74 \pm 0.03$ , and the rectangular symbol for  $10.36 \pm 0.09 \mu m$ . The open symbol stands for the droplet-generation regime, the half-filled symbol for the transition regime, the filled symbol for the stable jet regime. The solid line stands for the width of  $2.89 \pm 0.08$ , the dashed line for  $4.74 \pm 0.03$ , and the dotted line for  $10.36 \pm 0.09 \mu m$ .

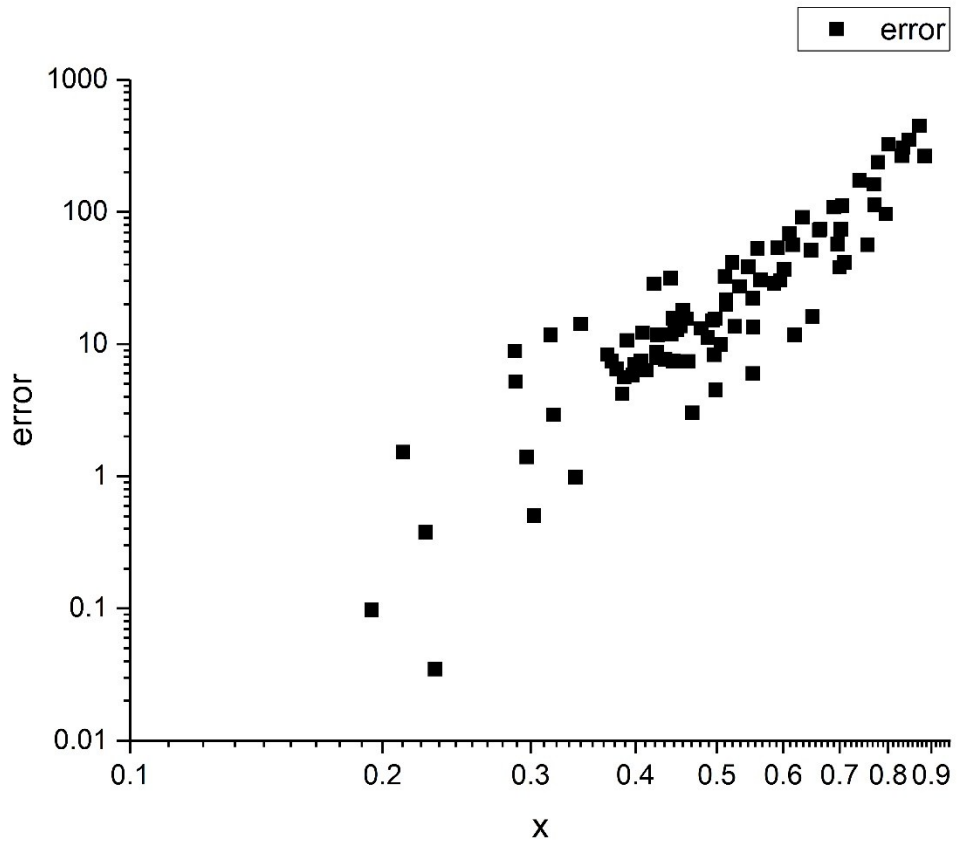

[Fig.SI-3] The breakup time error(%) of theoretical prediction (Eq.(3)) from the measured data. X is the ratio of the thread diameter and channel height.

### [Derivation of Eq. (1)]

An incompressible, laminar flow in a cylindrical pipe is considered that is fully-developed, unidirectional, and with no applied body force. The Navier-Stokes equation then gives

$$0 = -\frac{dP}{dx} + \mu \frac{1}{r} \frac{d}{dr} \left( r \frac{dv}{dr} \right) \quad (\text{SI-1})$$

We first consider the inlet channel of the DEX-rich phase the radius of which is  $R_D$ . The velocity profile is then obtained as

$$v_D^i = -\frac{1}{4\mu} \frac{dP}{dx} (R_D^2 - r^2)$$

and

$$Q_D = \int_0^{R_D} 2\pi r dr v_D^i$$

. So,

$$Q_D = -\frac{1}{8\mu} \frac{dP}{dx} R_D^4 \quad (\text{SI-2})$$

Here we put the pressure gradient as

$$\frac{dP}{dx} = \frac{P_j - P_D}{l_D}$$

And get

$$Q_D = -\frac{\pi}{8\mu} \frac{P_j - P_D}{l_D} R_D^4 \quad (\text{SI-3})$$

Where the subscript j stands for the location where the DEX and PEG flows joins. We then consider the flow in the main channel where the DEX-rich phase occupies the inner region in the pipe,  $0 \leq r < r_D$ , and the PEG-rich phase occupies the outer region,  $r_D < r \leq R$ .

After integrating Eq. (SI-1), the boundary condition determine that,

at  $r = r_D$ ,

$$\frac{1}{4\mu_D} \frac{dP}{dx} r_D^2 + B_D = \frac{1}{4\mu_p} \frac{dP}{dx} r_D^2 + B_p$$

and, at  $r = R$ ,

$$0 = \frac{1}{4\mu_p} \frac{dP}{dx} R^2 + B_p$$

So that we get the velocity profiles as

$$v_P = \frac{1}{4\mu_p} \frac{dP}{dx} r^2 - \frac{1}{4\mu_p} \frac{dP}{dx} R^2$$

and

$$v_D = \frac{1}{4\mu_D} \frac{dP}{dx} r^2 + \frac{1}{4} \left( \frac{1}{\mu_p} - \frac{1}{\mu_D} \right) \frac{dP}{dx} r_D^2 - \frac{1}{4\mu_p} \frac{dP}{dx} R^2$$

By integration, we get the volume flow rates,

$$Q_P = \int_{r_D}^R 2\pi r dr v_P$$

$$Q_P = -\frac{\pi}{8\mu_p} \frac{dP}{dx} (r_D^2 - R^2)^2 \quad (\text{SI-4})$$

$$Q_D = \int_0^{r_D} 2\pi r dr v_D$$

$$\therefore Q_D = -\frac{\pi}{8\mu_D} \frac{dP}{dx} r_D^4 - \frac{\pi}{4\mu_D} \frac{dP}{dx} r_D^2 (R^2 - r_D^2) \quad \dots(3)$$

Applying  $\frac{dP}{dx} = \frac{P_{out} - P_j}{l_D}$  to Eq. (SI-4), we get

$$Q_P = -\frac{\pi}{8\mu_p} \frac{P_{out} - P_j}{l_D} (r_D^2 - R^2)^2$$

And, therefore,

$$P_j = Q_P \frac{8\mu_p}{\pi} \frac{l_D}{(r_D^2 - R^2)^2} + P_{out} \quad (\text{SI-5})$$

Putting Eq.(SI-5) into Eq.(SI-3), we get Eq.(1):

$$Q_D = \frac{\pi}{8\mu_D} \frac{R_D^4}{l_D} (P_D - P_{out}) - Q_P \frac{\mu_p}{\mu_D} \left( \frac{l}{l_D} \right) \frac{R_D^4}{(r_D^2 - R^2)^2} \quad (\text{SI-6})$$

We can also start out with a geometry with rectangular channel with a high aspect ratio such as width,  $2w$ , height,  $2h$ , and  $w \gg h$ . Following similar steps in the previous derivation, we can obtain:

$$Q_D = \frac{4}{3} (P_D - P_{out}) / \mu_D \left( \frac{l}{wh^3} + \frac{l_D}{w_D h_D^3} \right) - Q_P \frac{\mu_p}{\mu_D} \frac{1}{1 + \frac{l_D w h^3}{l w_D h_D^3}} \quad (\text{SI-7})$$
